# Supplementary material for: Physcion-8-O-β-D-monoglucoside protects hepatocytes from TNF-α-mediated apoptosis by suppressing the PI3K/AKT /NF-κB signaling pathway
Source: Research Square preprint supplement (doi:10.21203/rs.3.rs-7542054/v1), 2025-09-24
Supplement: Supplementary file 1 [file 3ef2a29c9ce45bdea7f234c0.pdf]

# Original Western Blots of Cells

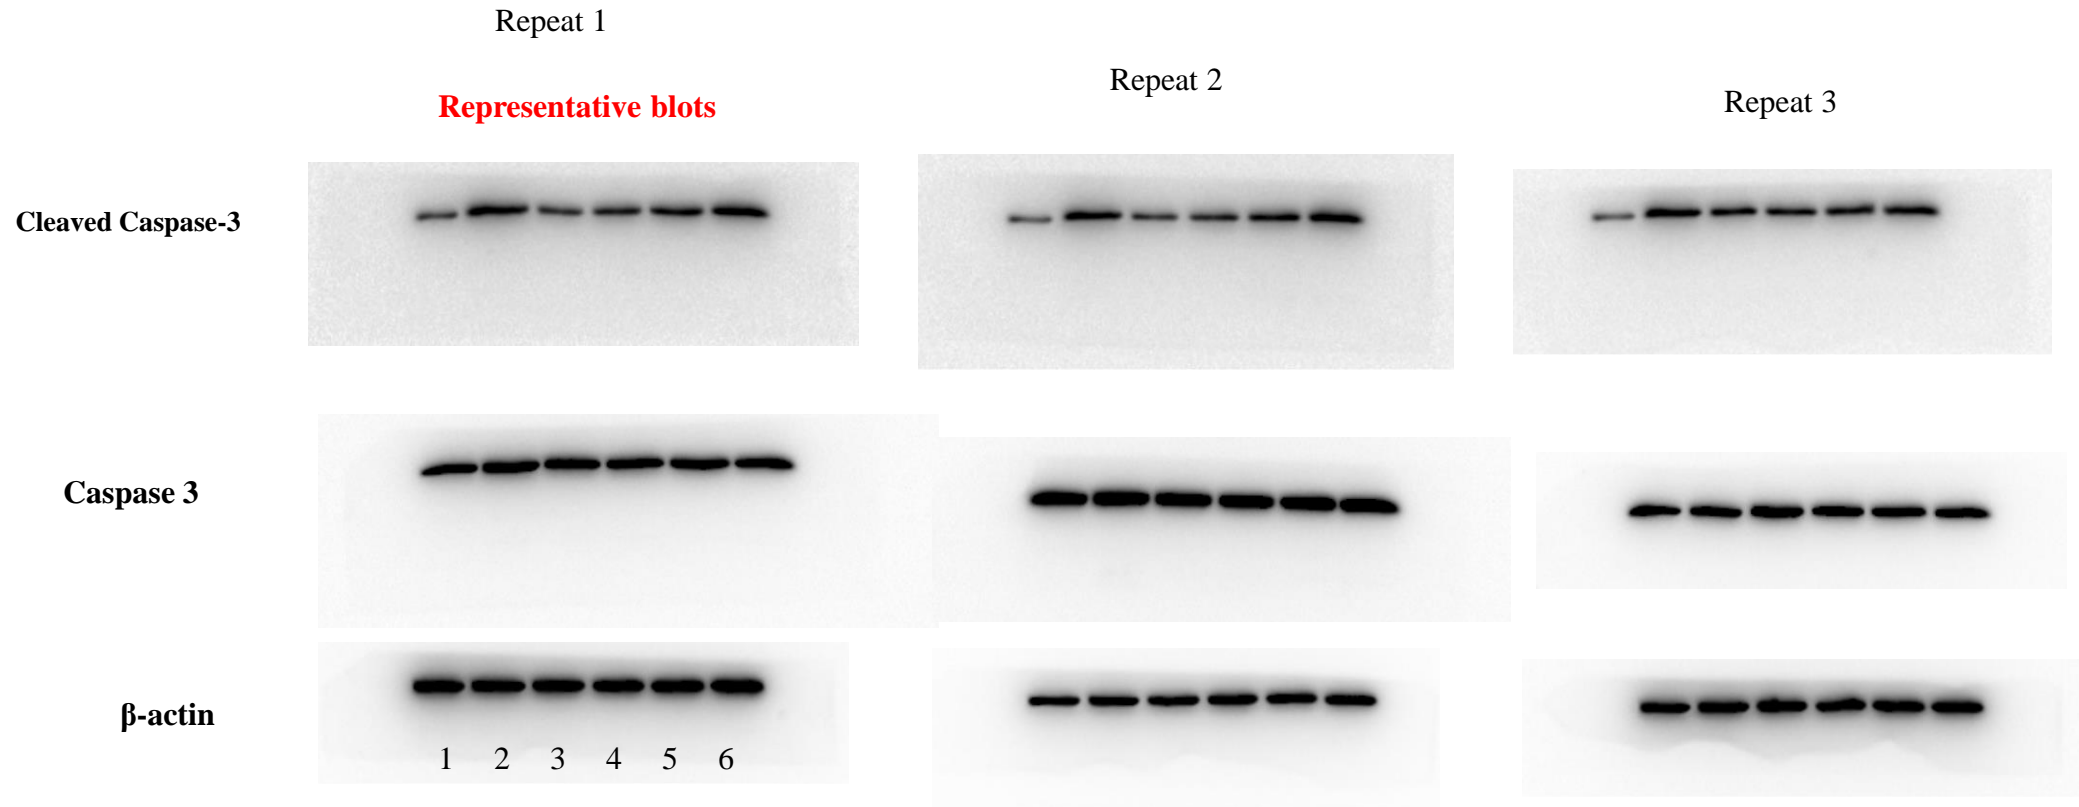

1: Control    2: TNF- $\alpha$  + ActD    3: PMG-80  $\mu$ M    4: PMG-40  $\mu$ M    5: PMG-20  $\mu$ M    6: PMG-10  $\mu$ M

**$\beta$ -actin served as the loading control protein.**

# Original Western Blots of Mice

Repeat 1

**Representative blots**

Repeat 2

Repeat 3

**TNF- $\alpha$**

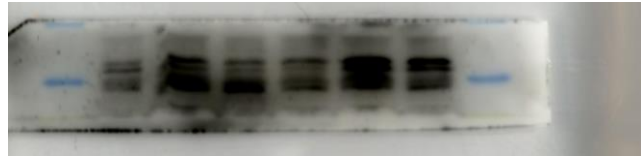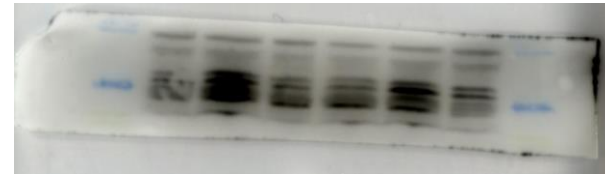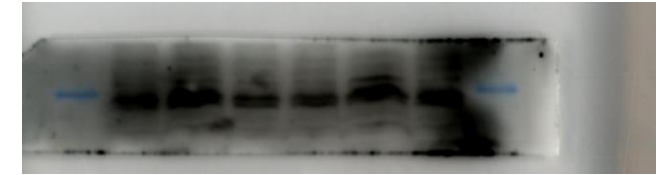

**IL-6**

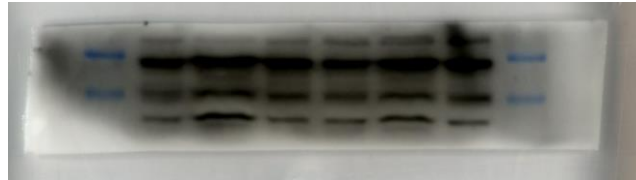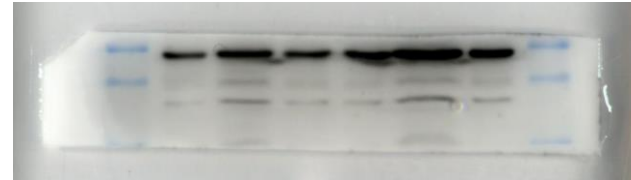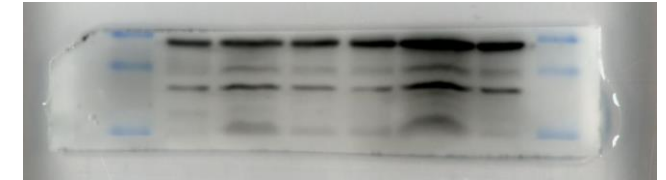

**$\beta$ -actin**

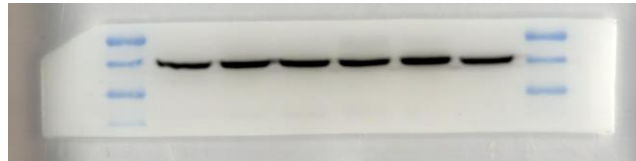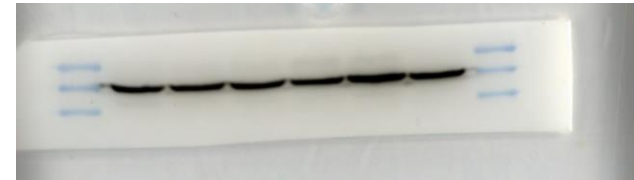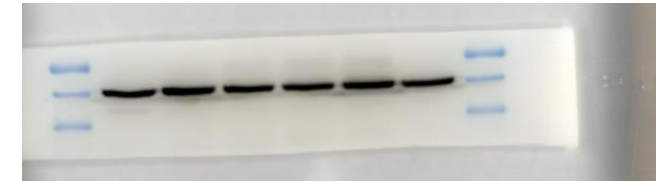

1 2 3 4 5 6

Repeat 4

Repeat 5

Repeat 6

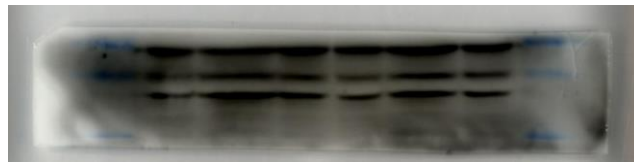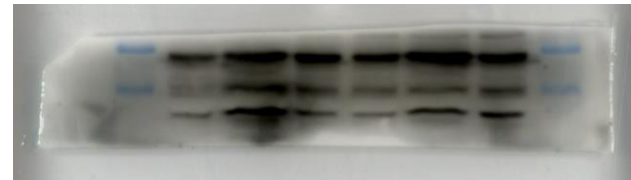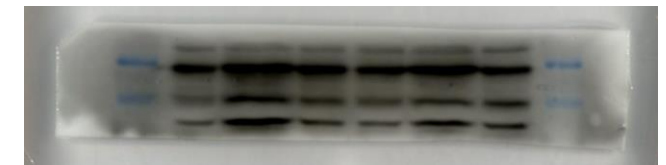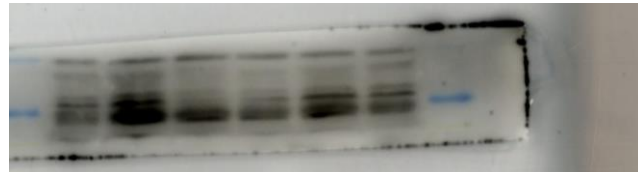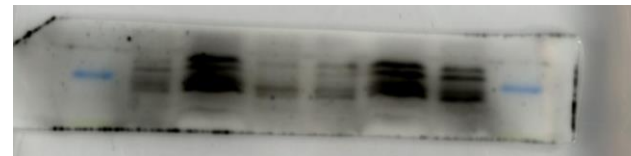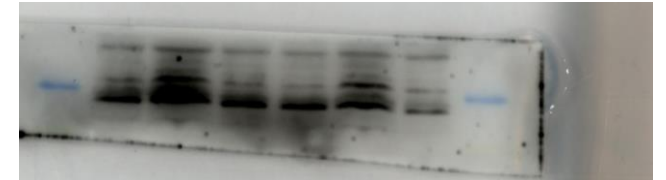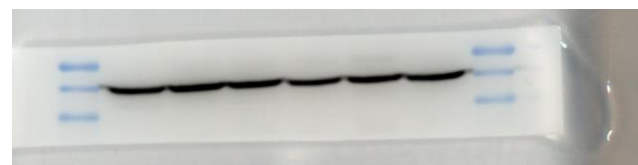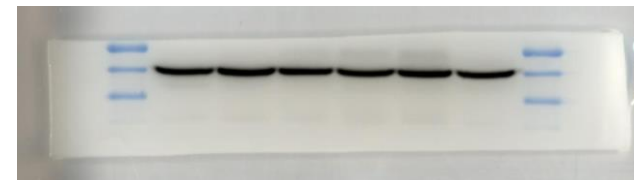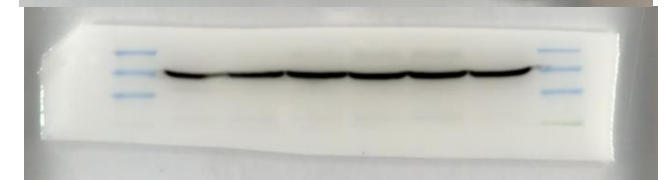

1: Control 2:CC14 3: PMG 4: Fn14-OE 5: NC 6: DDB  **$\beta$ -actin served as the loading control protein.**

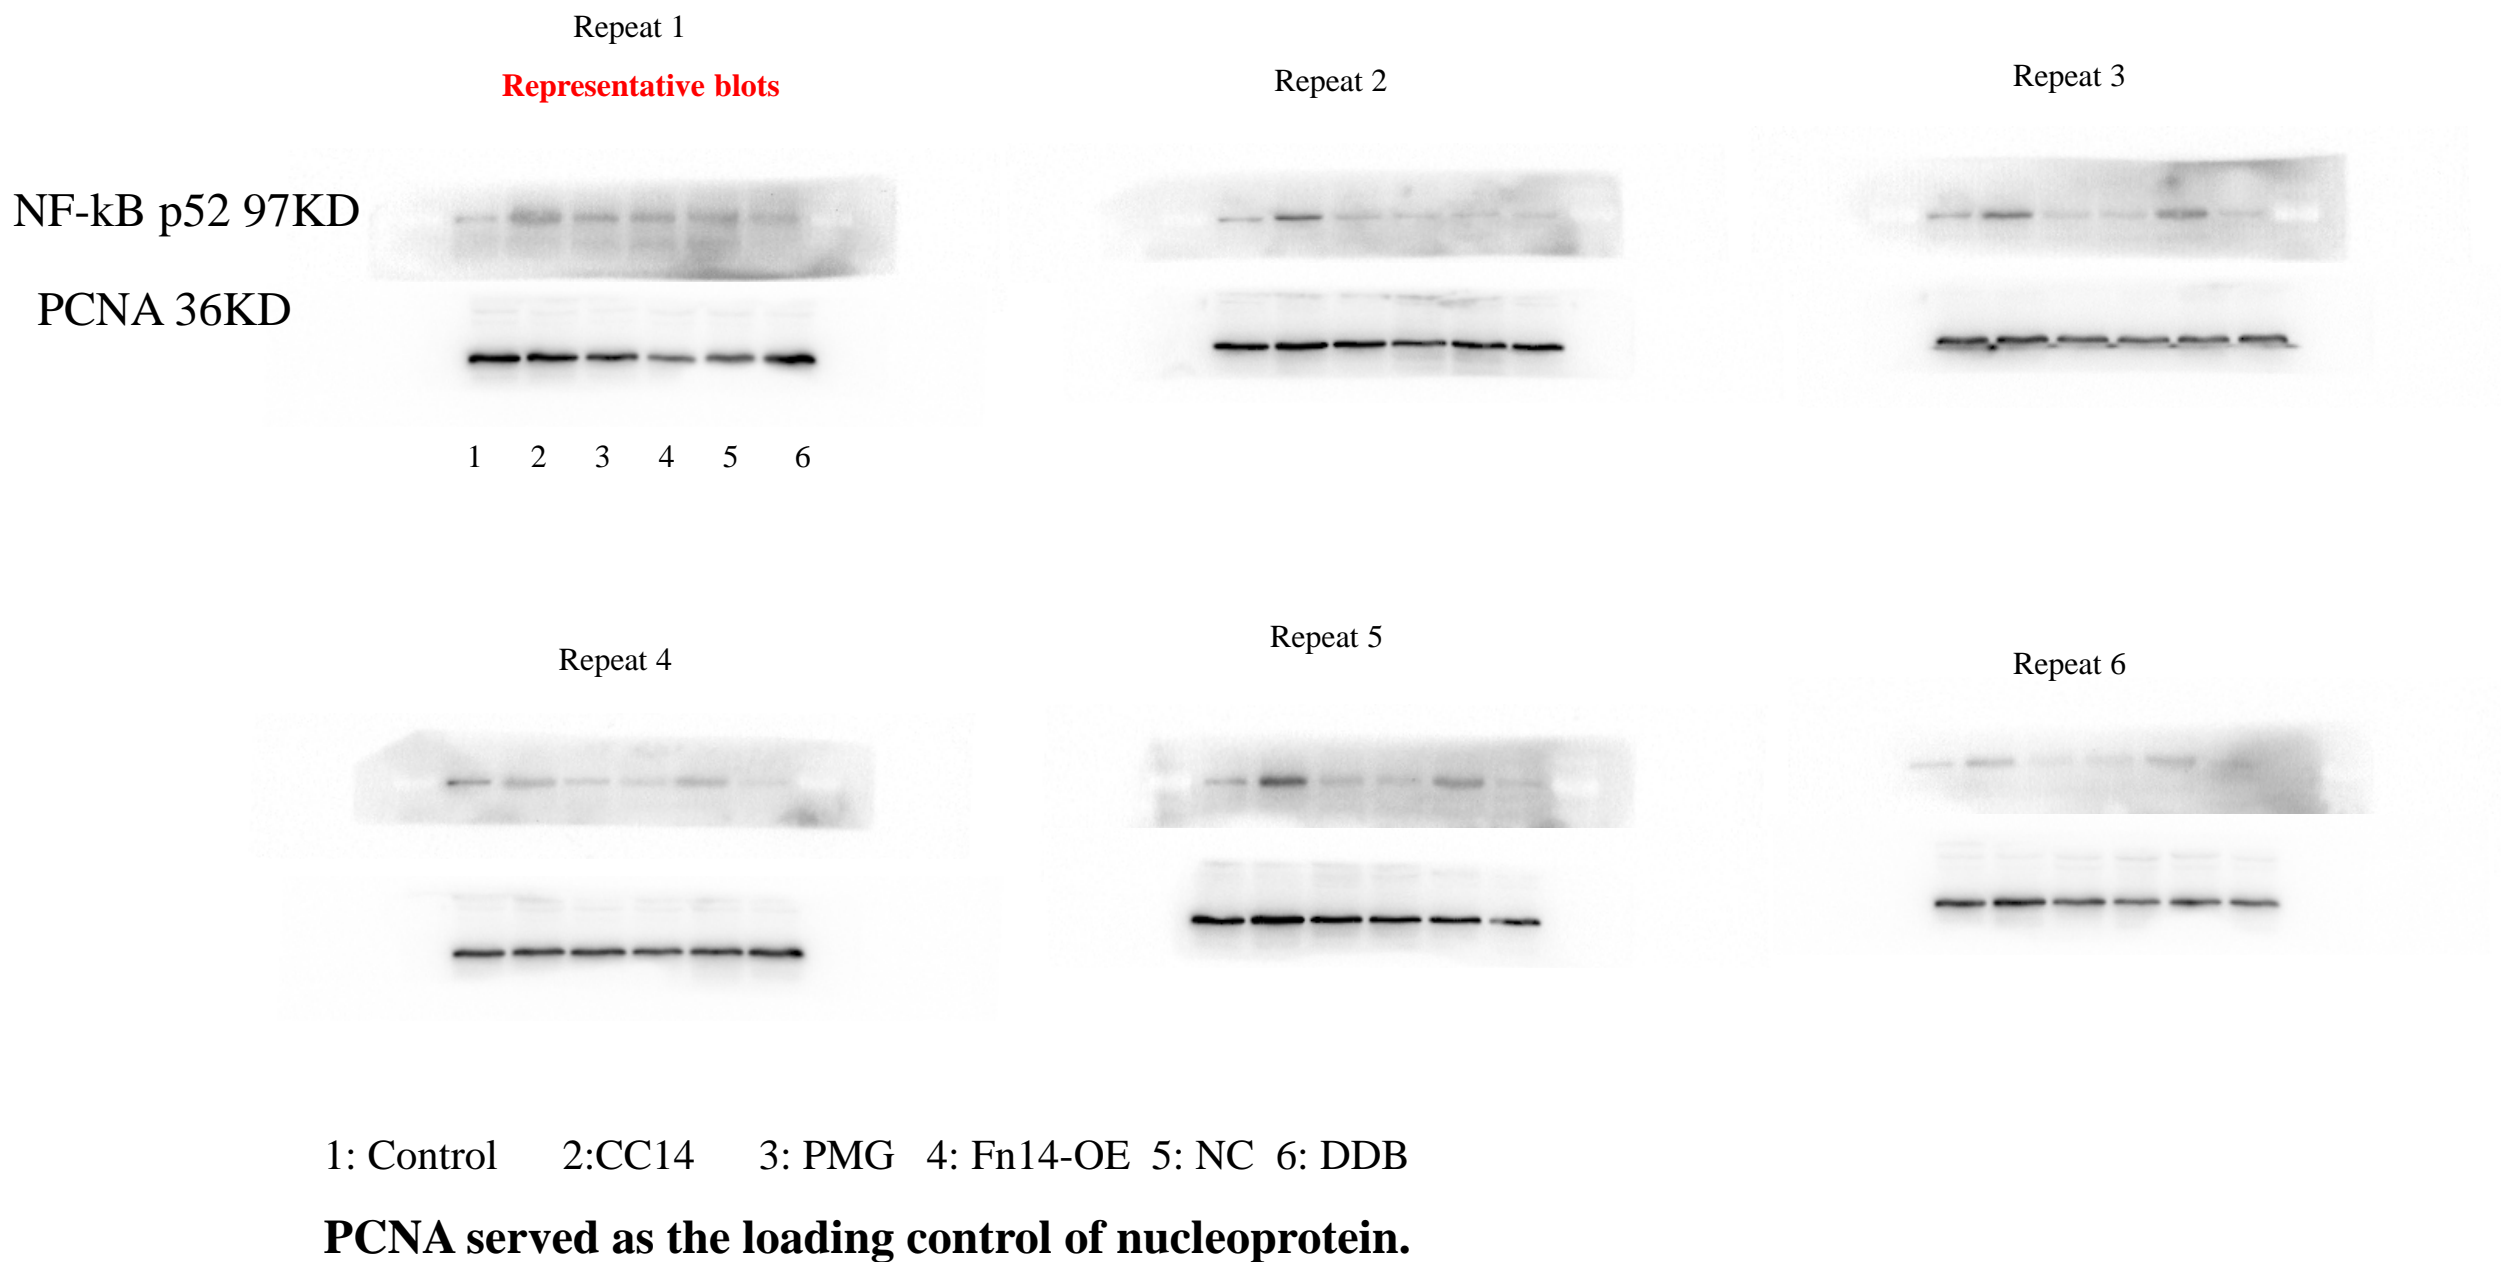

Repeat 1

**Representative blots**

**Cleaved  
Caspase 3**

**Caspase 3**

**$\beta$ -actin**

1 2 3 4 5 6

Repeat 2

Repeat 3

Repeat 4

Repeat 5

Repeat 6

1: Control 2: CC14 3: PMG 4: Fn14-OE 5: NC 6: DDB

**$\beta$ -actin served as the loading control protein.**

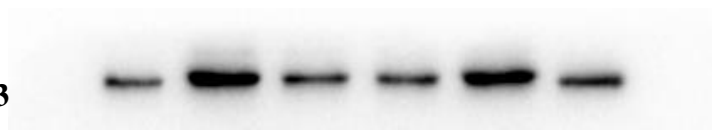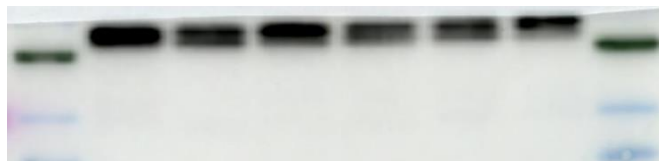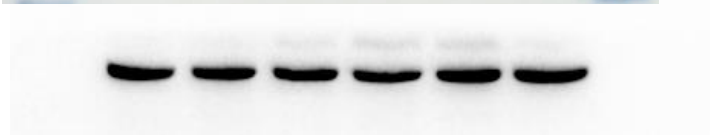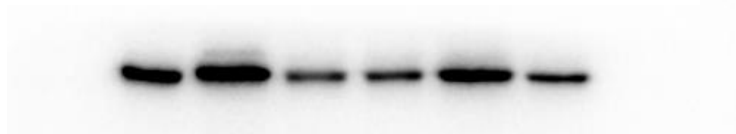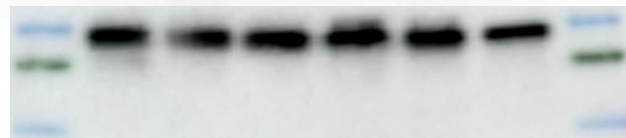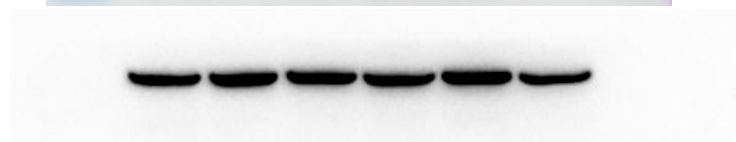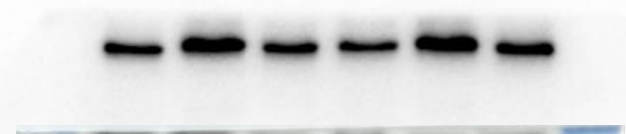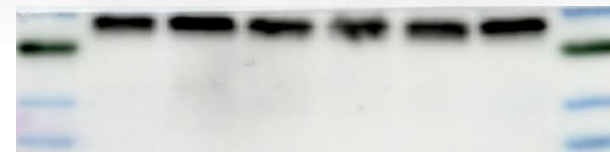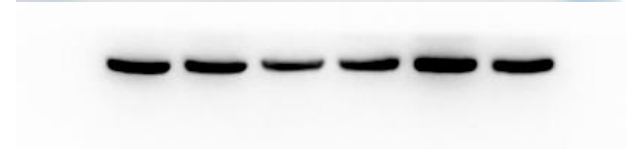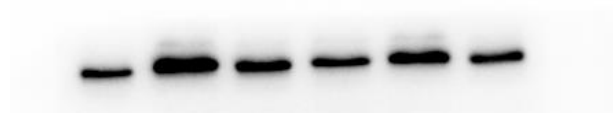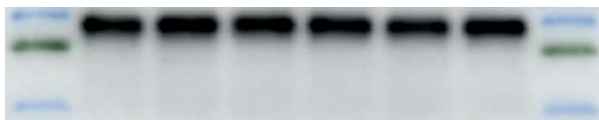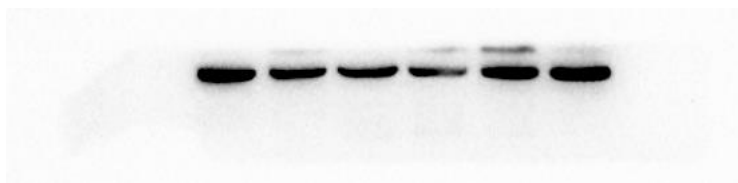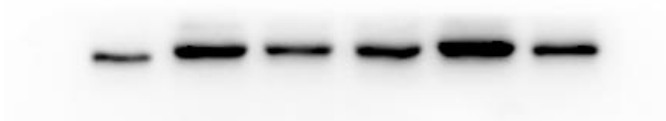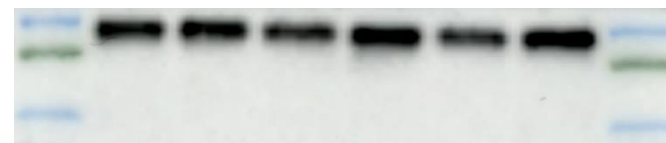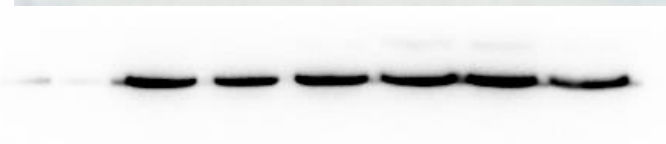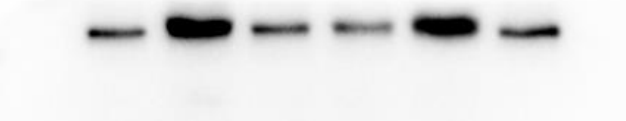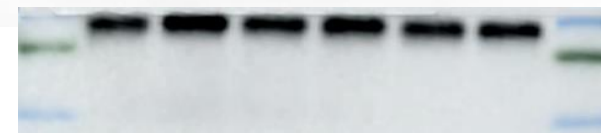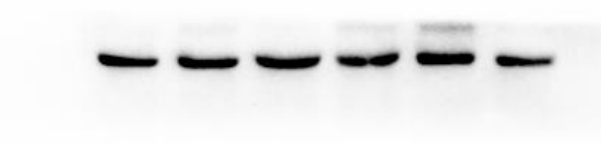

**Representative blots**

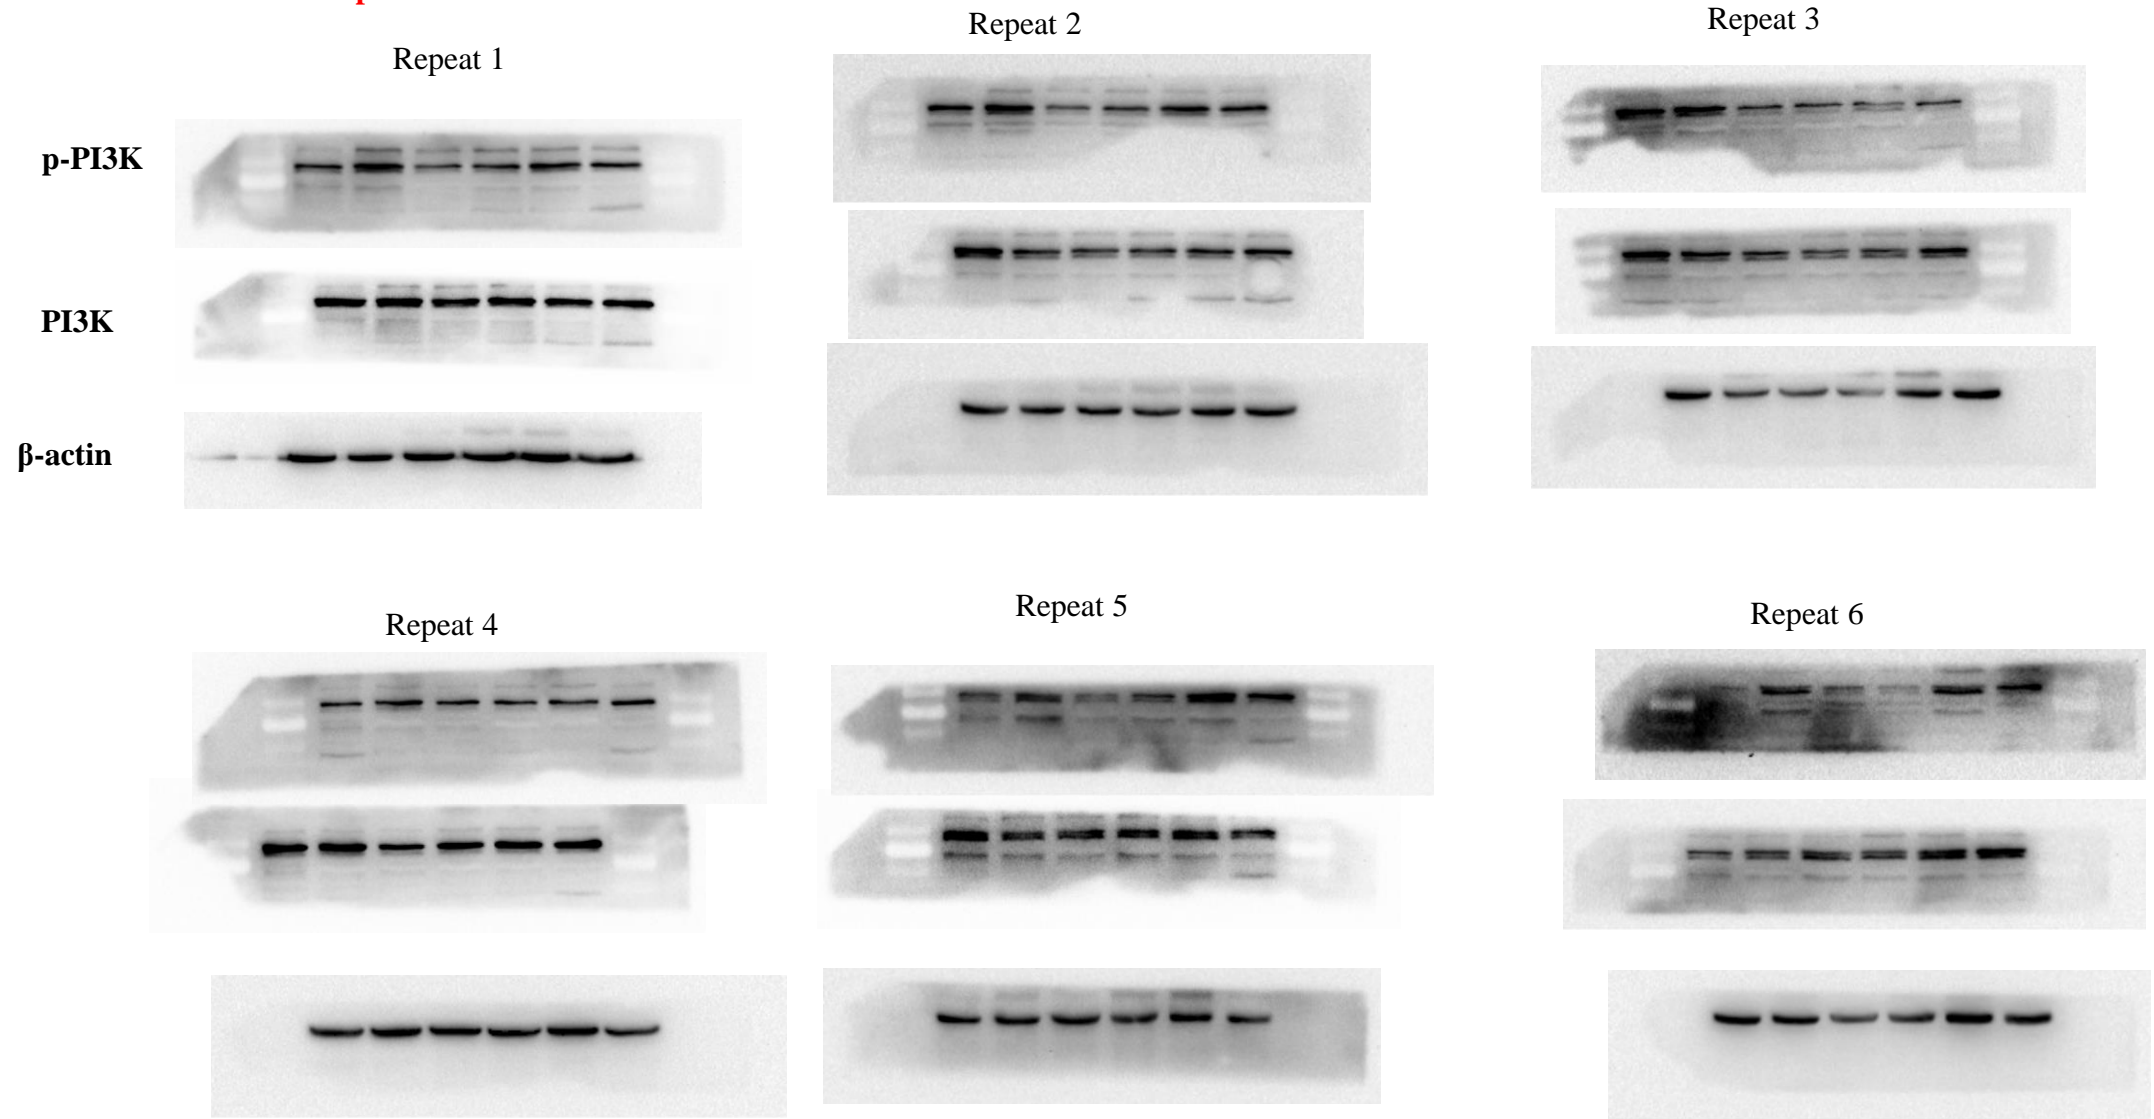

1: Control 2: CC14 3: PMG 4: Fn14-OE 5: NC 6: DDB  $\beta$ -actin served as the loading control protein.



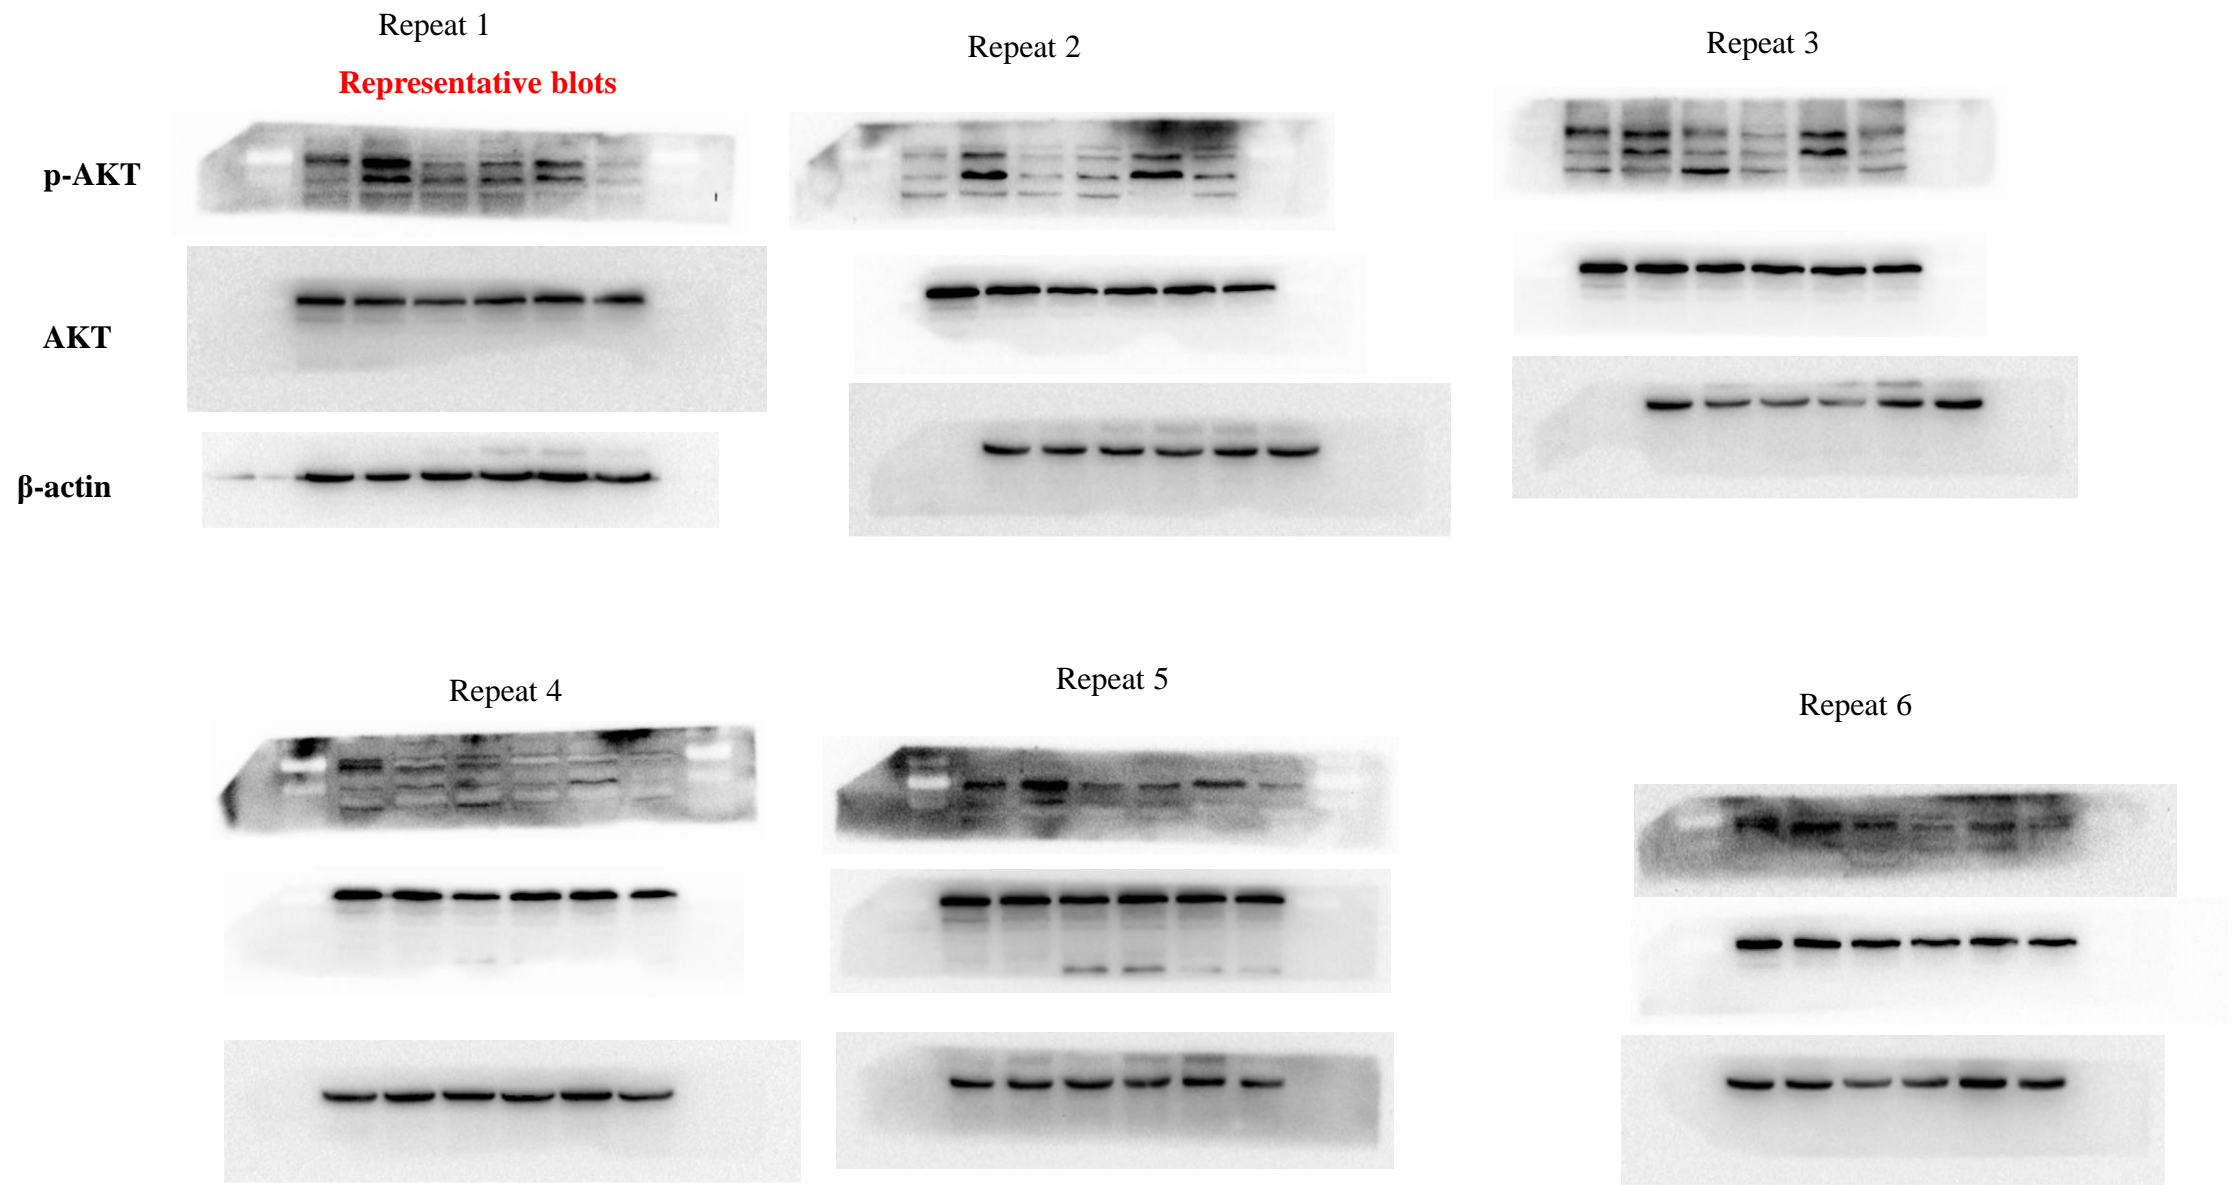

The control images ( $\beta$ -actin) are re-used, the same with those for PI3K.
